# Supplementary material for: The role of geochemistry in organic carbon stabilization in tropical rainforest soils
Source: Copernicus journal article supplement (doi:10.5194/soil-2020-92), 2021-01-05
Supplement: Supplementary file 1 [file soil-2020-92-supplement.pdf]

# The role of geochemistry in organic carbon stabilization in tropical rainforest soils

Mario Reichenbach<sup>1</sup>, Peter Fiener<sup>1</sup>, Gina Garland<sup>2</sup>, Marco Griepentrog<sup>2</sup>, Johan Six<sup>2</sup>, and Sebastian Doetterl<sup>1,2</sup>

<sup>1</sup>Institute of Geography, Augsburg University, Augsburg, 86159 Germany

5 <sup>2</sup>Department of Environmental System Science, ETH Zurich, Zurich, 8092, Switzerland

*Correspondence to: S. Doetterl (sdoetterl@usys.ethz.ch)*

## Supplemented information on valley positions

10 The following text represents the supplementary results and short discussion on geochemical soil parameters, SOC stocks and stabilization assessed at valley positions of contrasting parent material geochemistry investigated in tropical rain mountain forest in the border region of the Congo and Nile basement. We show that, in valley positions, significant variation in the size of SOC stocks are related to changes in hydrological conditions and alluvial processes compared to non-valley positions. Geochemical differences in SOC stabilization mechanisms  
15 between regions remain in place, but are less prominent in valleys than at non-valley positions.

### SI 1 Supplementary results on valley positions

#### 20 **1.1 Pedogenic oxides**

For valley positions, pyrophosphate extractable oxide mass (0.02 to 0.66 mass%) and oxalate extractable oxide mass (0.03 to 4.29 mass%) were low compared to DCB extractable oxide mass (0.11 to 10.79 mass%) (Fig. S1). In general, valley positions showed a comparable picture compared to non-valley positions (Fig. 3, S1) with the exception that valley soils in the mixed sedimentary region had considerably lower amounts of pedogenic oxides  
25 at all soil depths (< 0.27 mass%) compared to valley soils in the mafic and felsic region.

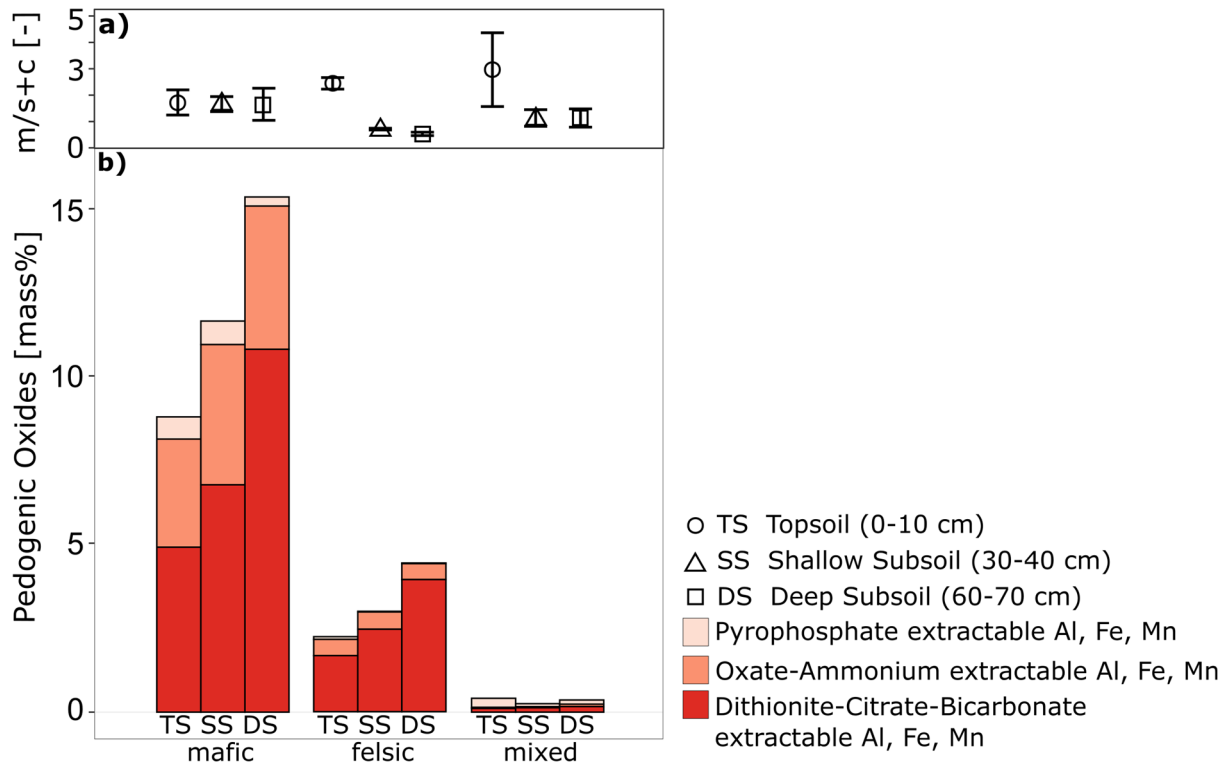

30 **Figure S1: (a)  $m / s+c$  ratio ( $n = 3$  per bar) and (b) pedogenic oxide fractions of the sequential extraction across geochemical regions in valley positions ( $n = 1$  per bar). Error bars represent standard error.**

## 1.2 Variation in SOC properties in valley positions with geochemistry

### *SOC<sub>bulk</sub>*

35 SOC<sub>bulk</sub> in topsoil was not significantly different between valley and non-valley positions. However, valley positions tended to be generally higher in SOC<sub>bulk</sub> than their non-valley counterparts. In shallow subsoil, SOC<sub>bulk</sub> was significantly higher in valley positions of the mafic site (SOC<sub>bulk</sub>:  $41.2 \pm 4.6 \text{ t C ha}^{-1}$ ) compared to non-valley positions (SOC<sub>bulk</sub>:  $25.0 \pm 0.2$  to  $30.0 \pm 3.2 \text{ t C ha}^{-1}$ ), but no difference was found for subsoils of the felsic and mixed sedimentary region (Figs.4, S2).

40

### *Abundance of C fractions*

In the felsic magmatic region, the abundance of microaggregate associated C and the ratio of  $m / s+c$  was more than twice as high in valley topsoils ( $m / s+c$ :  $2.5 \pm 0.4$ ) compared to non-valley topsoils ( $m / s+c$ :  $1.2 \pm 0.5$  to  $1.4 \pm 0.5$ ) (Figs. 3a, S1a). Additionally, SOC<sub>>250 μm</sub> in topsoil of valley positions of the mixed sedimentary region was about threefold higher in valleys ( $22.2 \pm 12.3 \%$ ) compared to the corresponding non-valley positions ( $6.5 \pm 7.1$  to  $6.7 \pm 4.0 \%$ ) (Figs. 4b, S2b), and the ratio of  $m / s+c$  exhibited a much higher variance in topsoils (Figs. 3a, S1ab).

45

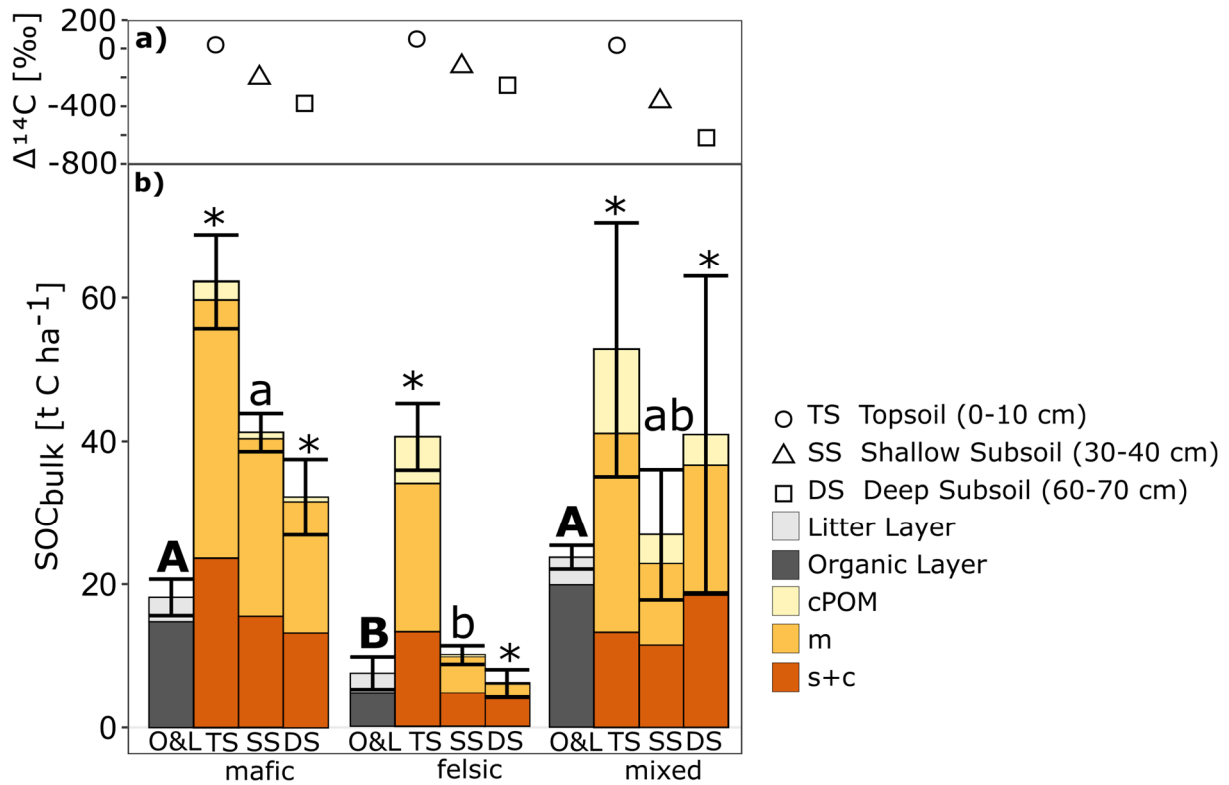

Figure S2: (a)  $\Delta^{14}\text{C}$  across geochemical regions in valley positions ( $n = 1$  per bar). (b)  $\text{SOC}_{\text{bulk}}$  and fractions across geochemical regions in valley positions ( $n = 3$  per bar). Letters indicate significant differences between geochemical regions per soil layer. Asterisks indicate no significant differences in means ( $p > 0.05$ ). In case of  $\Delta^{14}\text{C}$  values, error bars are smaller than symbols. cPOM – coarse particulate organic matter, m – waterstable microaggregates, s+c – free silt and clay fraction.

#### Changes in $^{14}\text{C}$ signature

Soils from all geochemical regions at valley positions were more depleted in  $\Delta^{14}\text{C}$  with increasing soil depth (Fig. S1a). The  $\Delta^{14}\text{C}$  ranged from  $65.1 \pm \text{N/A} \text{ ‰}$  (felsic) to  $20.4 \pm \text{N/A} \text{ ‰}$  (mixed sedimentary) in the topsoil, and  $-256.5 \pm \text{N/A} \text{ ‰}$  (felsic) to  $-617.4 \pm \text{N/A} \text{ ‰}$  (mixed sedimentary). The contribution of FOC to soil C in the mixed sedimentary region increased with soil depth for valley positions, ranging from  $1.8 \pm \text{N/A} \text{ ‰}$  FOC in topsoils to  $43.5 \pm \text{N/A} \text{ ‰}$  in subsoils (Table S1).

**Table S1: Proportion of biogenic vs. fossil derived organic carbon (OC) in soils developed from mixed sedimentary rocks in valley positions ( $n=1$ ). Standard deviation was not applicable (N/A). FOC values in felsic and mafic soils = 0 % (data not shown).**

| depth increment | amount of biogenic OC (%) | amount of fossil OC (%) |
|-----------------|---------------------------|-------------------------|
| 0 - 10 cm       | $98.2 \pm \text{N/A}$     | $1.8 \pm \text{N/A}$    |
| 30 - 40 cm      | $72.1 \pm \text{N/A}$     | $27.9 \pm \text{N/A}$   |
| 60 - 70 cm      | $56.5 \pm \text{N/A}$     | $43.5 \pm \text{N/A}$   |

### 1.3 Rotated principal component explained variance and loadings

80 For valley soils, five rPCs were determined (rPC<sub>v</sub>) explaining 92.7 % of the variance in the valley position subset (Table A4, Fig. S3). rPC1<sub>v</sub> (Eigenvalue 10.7, explaining 38.2 % of the variance) represents solid phase mineralogy, in which total metal oxide concentration, total P and oxalate extractable oxides concentration had strong positive loadings ( $\geq 0.98$ ), while total Si, pH / clay ratio and sand content had strong negative loadings ( $\leq -0.69$ ). rPC2<sub>v</sub>, (Eigenvalue 9.65, explaining 34.5 % of the variance) represents the chemistry of the soil solution and silt content where CEC base saturation, pH and CEC base saturation / clay ratio showed strong positive loadings ( $\geq 0.92$ ) while CIA, SOC<sub>organic</sub> and exchangeable acidity showed negative loadings ( $\leq -0.78$ ). rPC3<sub>v</sub> (Eigenvalue 2.5, explaining 9 % of the variance) represents bioavailable P and Al weathering. Bioavailable P showed positive loadings (0.69), while Al<sub>dcb</sub> / Al<sub>t</sub> ratio showed negative loadings (-0.91). rPC4<sub>v</sub> (Eigenvalue 1.65, explaining 6 % of the variance) represents root input and exchangeable acidity, both having strong positive loadings ( $\geq 0.55$ ). rPC5<sub>v</sub> (Eigenvalue 1.46, explaining 5 % of the variance) represents Fe weathering and litter C stock in which both the Fe<sub>dcb</sub> / Fe<sub>t</sub> ratio and Litter C stock (SOC<sub>litter</sub>) had strong positive loadings ( $\geq 0.66$ ).

95

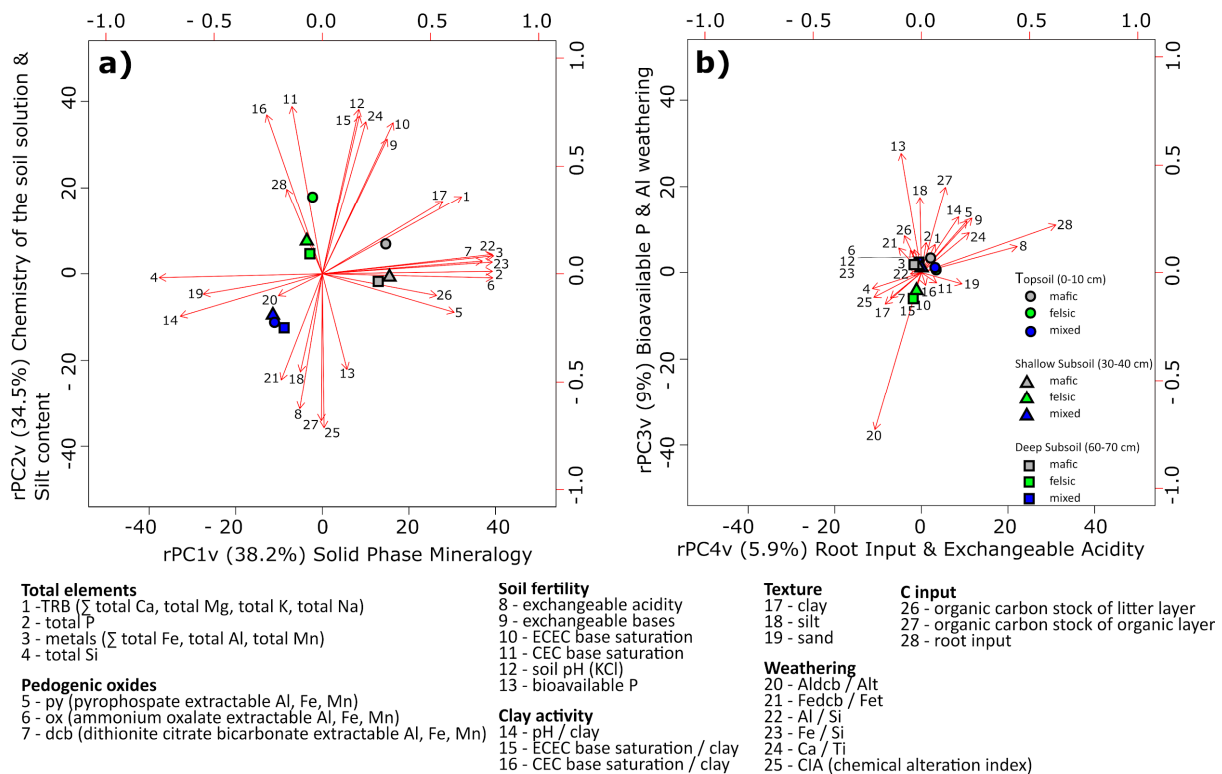

100 **Figure S3: Biplots of the varimax rotated principal component analysis. (a) rPC1<sub>v</sub> and rPC2<sub>v</sub> and (b) rPC3<sub>v</sub> and rPC4<sub>v</sub> of non-valley positions (N = 9). Observations cluster together based on similarities within geochemical regions and their distinction to other geochemical regions. Vector length indicates how strongly variables influence a specific rPC. The angles between vectors display the degree of auto-correlation between variables. Small angles represent positive correlations and high degree of autocorrelation, diverging angles represent negative correlations and high degree of autocorrelation, high angles indicate no correlations between variables and/or rPCs.**

105

110 SI 2 Supplementary short discussion on valley positions

**2 Soil C stabilization driven by soil chemistry and parent material rather than topography**

In contrast to our initial hypothesis that topography affects C stabilization in tropical forest soils through lateral material movements, we found no indication of this in our analysis (Table A1). This is supported by Drake et al. (2019) who showed that C fluxes from pristine forest catchments within the same study area are characterized by young C from organic layers, with no indication of erosion of older, mineral stabilized C. Similarly, Wilken et al. (2021), using plutonium tracers to analyze soil redistribution along forest hillslopes did not detect any signs of decadal erosional processes of soils for the same sites as used in this study. Even though material fluxes due to lateral water fluxes along slopes cannot be excluded over longer time scales (e.g. 100 to 1,000 years), our results pointed to no recent natural or anthropogenic induced erosional processes in the investigated sites. However, there was a detectable effect on SOC<sub>bulk</sub> between positions that are affected by riverine and alluvial dynamics with regularly high water saturation (valleys) vs. well drained positions (non-valleys), with valleys generally having higher SOC<sub>bulk</sub> than their non-valley counterparts. Gleyic properties and fluvial sedimentation processes recorded in valley soils during profile description (Doetterl and Fiener, 2021) supported this interpretation. Overall, we found that in valley positions differences in SOC variables are rather related to changes in hydrological conditions and alluvial processes than by chemical soil properties.

**SI 3 Supplementary references**

Doetterl, S., Baert, G., Bauters, M., Boeckx, P., Cadisch, G., Cizungu, L., Hoyt, A., Kabaske, C., Kalbitz, K., Mujinya, B., Rewald, B., Six, J., van Oost, K., Verheyen, K., Vogel, C., Wilken, F., and Fiener, P.: Organic matter cycling along geochemical, geomorphic and disturbance gradients in vegetation and soils of African tropical forests and cropland – Project TropSOC, SOIL DISCUSSIONS, in review, 2021.

Drake, T. W., van Oost, K., Barthel, M., Bauters, M., Hoyt, A. M., Podgorski, D. C., Six, J., Boeckx, P., Trumbore, S. E., Ntaboba, L. C., and Spencer, R. G. M.: Mobilization of aged and biolabile soil carbon by tropical deforestation, *Nat. Geosci.*, 12, 541-546, <https://doi.org/10.1038/s41561-019-0384-9>, 2019.

Wilken, F., Fiener, P., Ketterer, M., Meusburger, K., Muhindo, D. I., van Ost, K., and Doetterl, S.: Assessing soil erosion in Tropical Africa using <sup>239+240</sup>Pu fallout radionuclides, SOIL DISCUSSIONS, in review, 2021.
